# Supplementary material for: Palmitic Acid Inhibits Myogenic Activity and Expression of Myosin Heavy Chain MHC IIb in Muscle Cells through Phosphorylation-Dependent MyoD Inactivation
Source: MDPI journal article supplement (doi:10.3390/ijms24065847), 2023-03-19
Supplement: s1 [file s1]

Supplementary Table S1. Sequences of primers used for real-time PCR

| Gene and encoded<br>protein names |         |                        |
|-----------------------------------|---------|------------------------|
| <i>Myod</i><br>(MyoD)             | Forward | CCCCGGCGGCAGAATGGCTACG |
|                                   | Reverse | GGTCTGGGTTCCTGTTCTGTGT |
| <i>Myog</i><br>(Myogenin)         | Forward | ACTCCCTTACGTCCATCGTG   |
|                                   | Reverse | CAGGACAGCCCCACTTAAAA   |
| <i>Myh7</i><br>(MHC I)            | Forward | CCAAGGGCCTGAATGAGGAG   |
|                                   | Reverse | GCAAAGGCTCCAGGTCTGAG   |
| <i>Myh2</i><br>(MHC IIa)          | Forward | AAGCGAAGAGTAAGGCTGTC   |
|                                   | Reverse | TGATTGCTTGCAAAGGAAC    |
| <i>Myh1</i><br>(MHC IIx)          | Forward | AGGCCAGGGTCCGTGAA      |
|                                   | Reverse | CCACGTTGCGCTTCTGTTC    |
| <i>Myh4</i><br>(MHC IIb)          | Forward | CCGAGCAAGAGCTACTGGA    |
|                                   | Reverse | TGTTGATGAGGCTGGTGTTC   |
| <i>Gapdh</i><br>(GAPDH)           | Forward | GTCGTGGATCTGACGTGCC    |
|                                   | Reverse | ATGCCTGCTTCACCACCTTC   |

MHC; myosin heavy chain, GAPDH; glyceraldehyde-3-phosphate dehydrogenase
